# Supplementary material for: Time-Restricted Feeding Attenuated Hypertension-Induced Cardiac Remodeling by Modulating Autophagy Levels in Spontaneously Hypertensive Rats
Source: Research Square preprint supplement (doi:10.21203/rs.3.rs-5452994/v1), 2025-04-23
Supplement: Supplementary file 1 [file 52dd2984f41e714739c5e37f.docx]

**Western Blot Raw Data**

**1.1 p-AKT**

**p-AKT(1).tif**

**
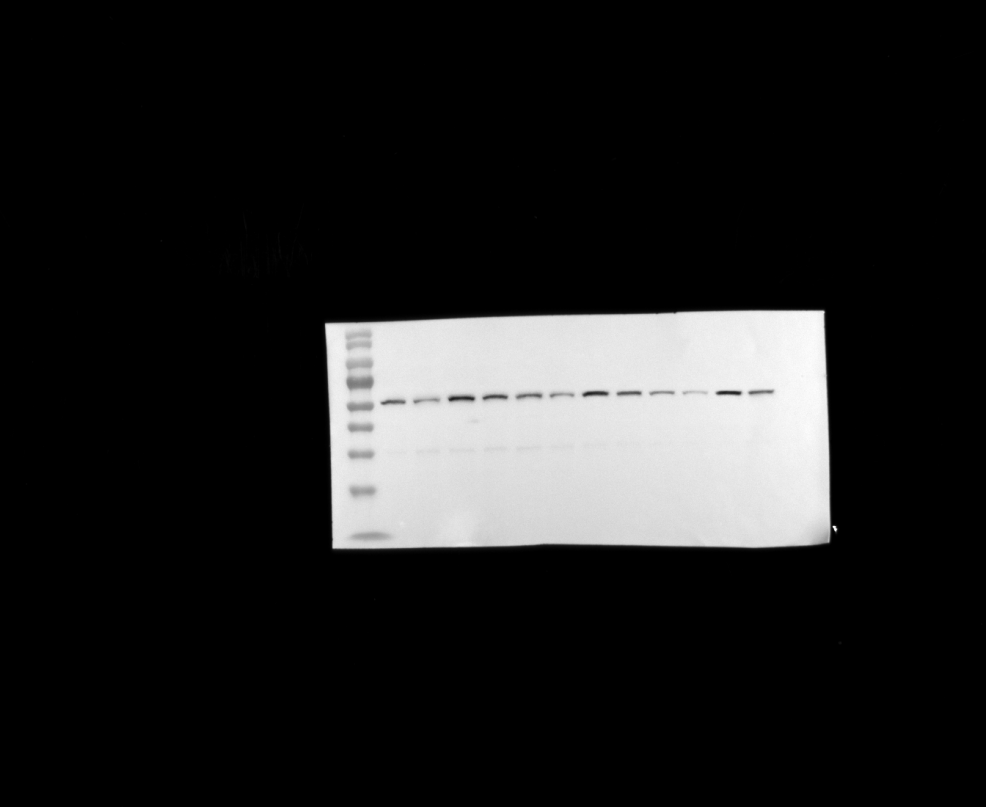
**


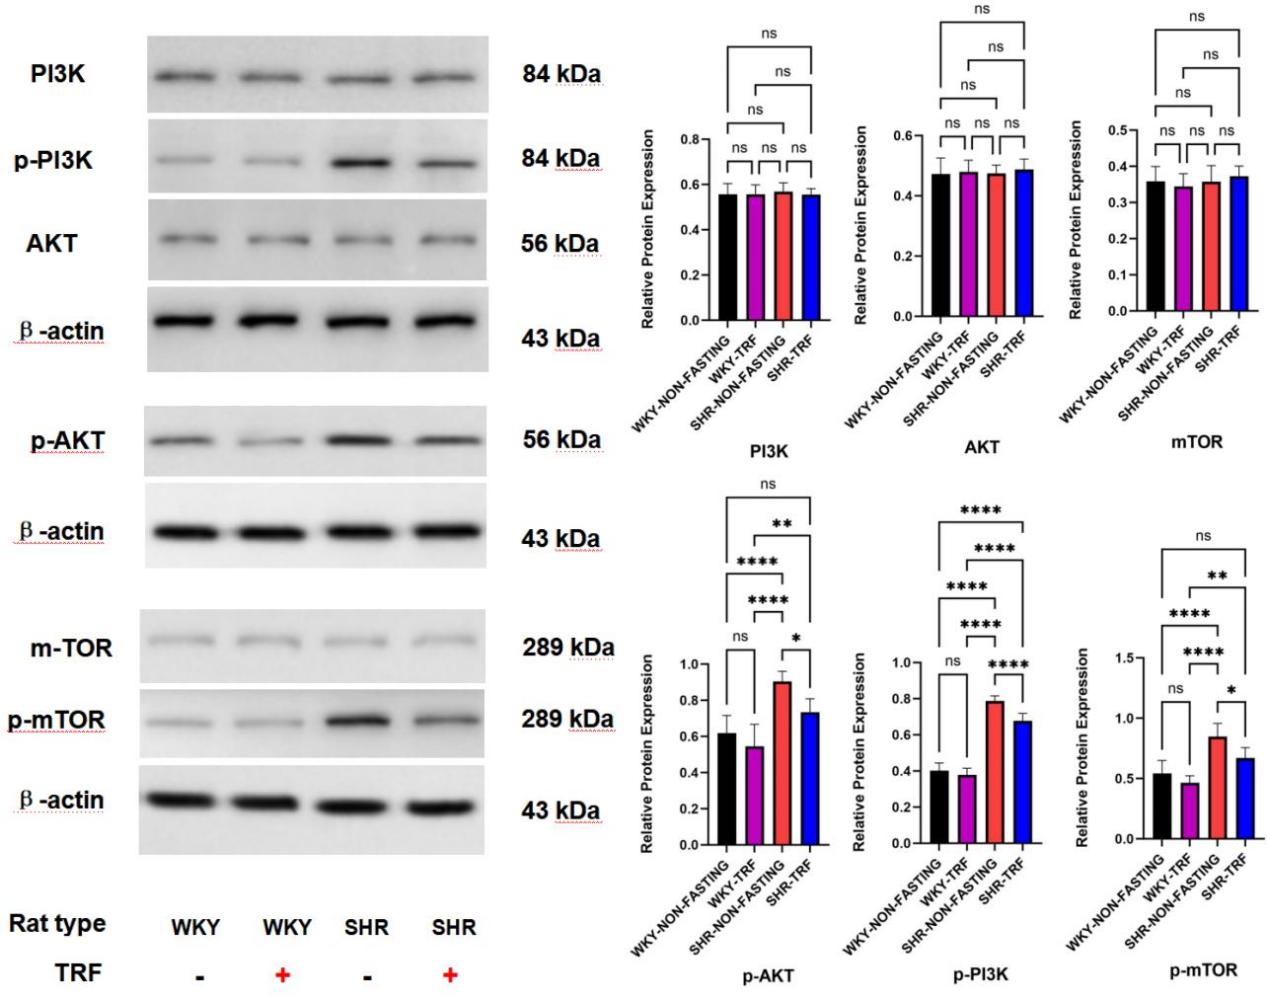
**p-AKT(2).tif**

**
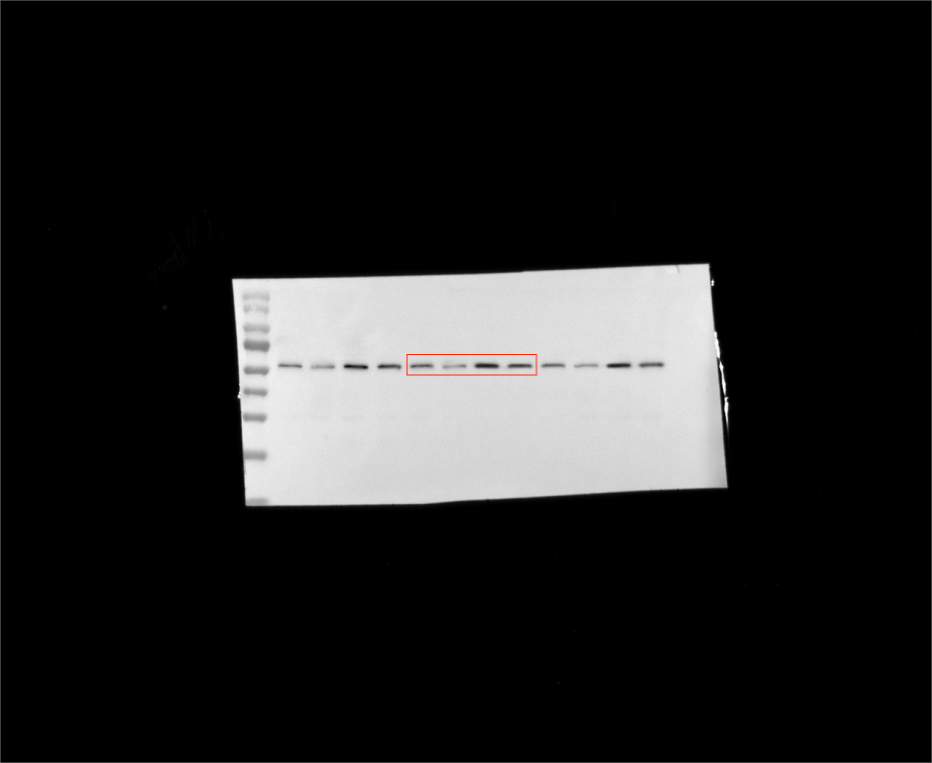
**

**Figure 8**

**β-actin(1).tif**

**
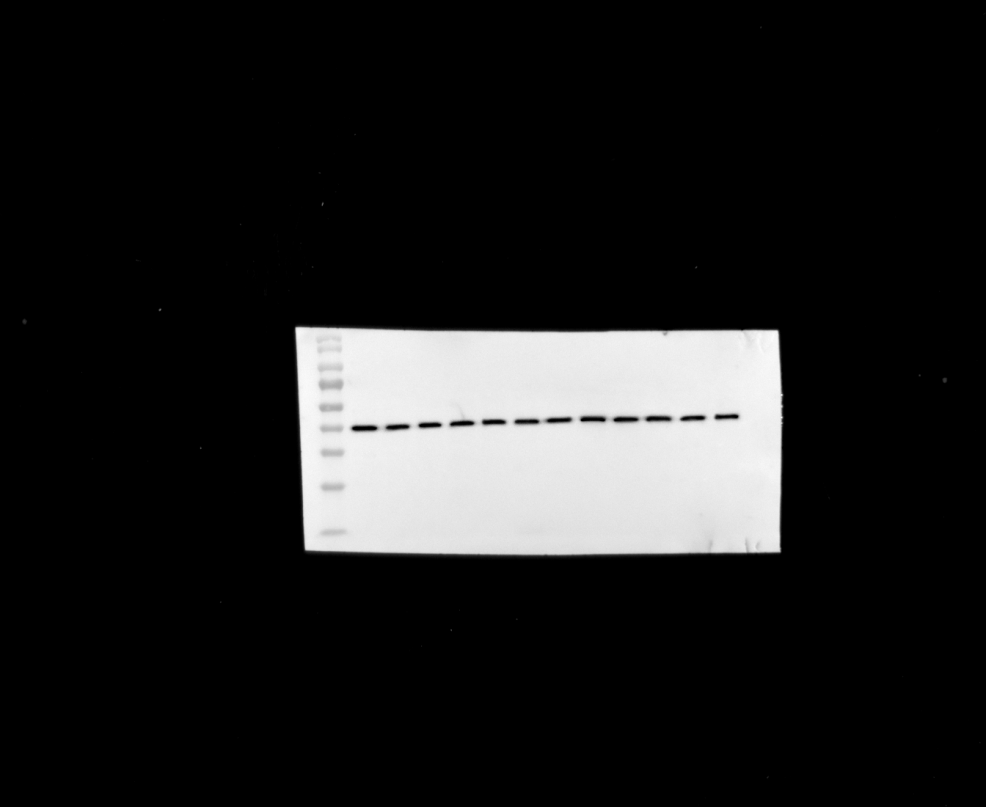
**


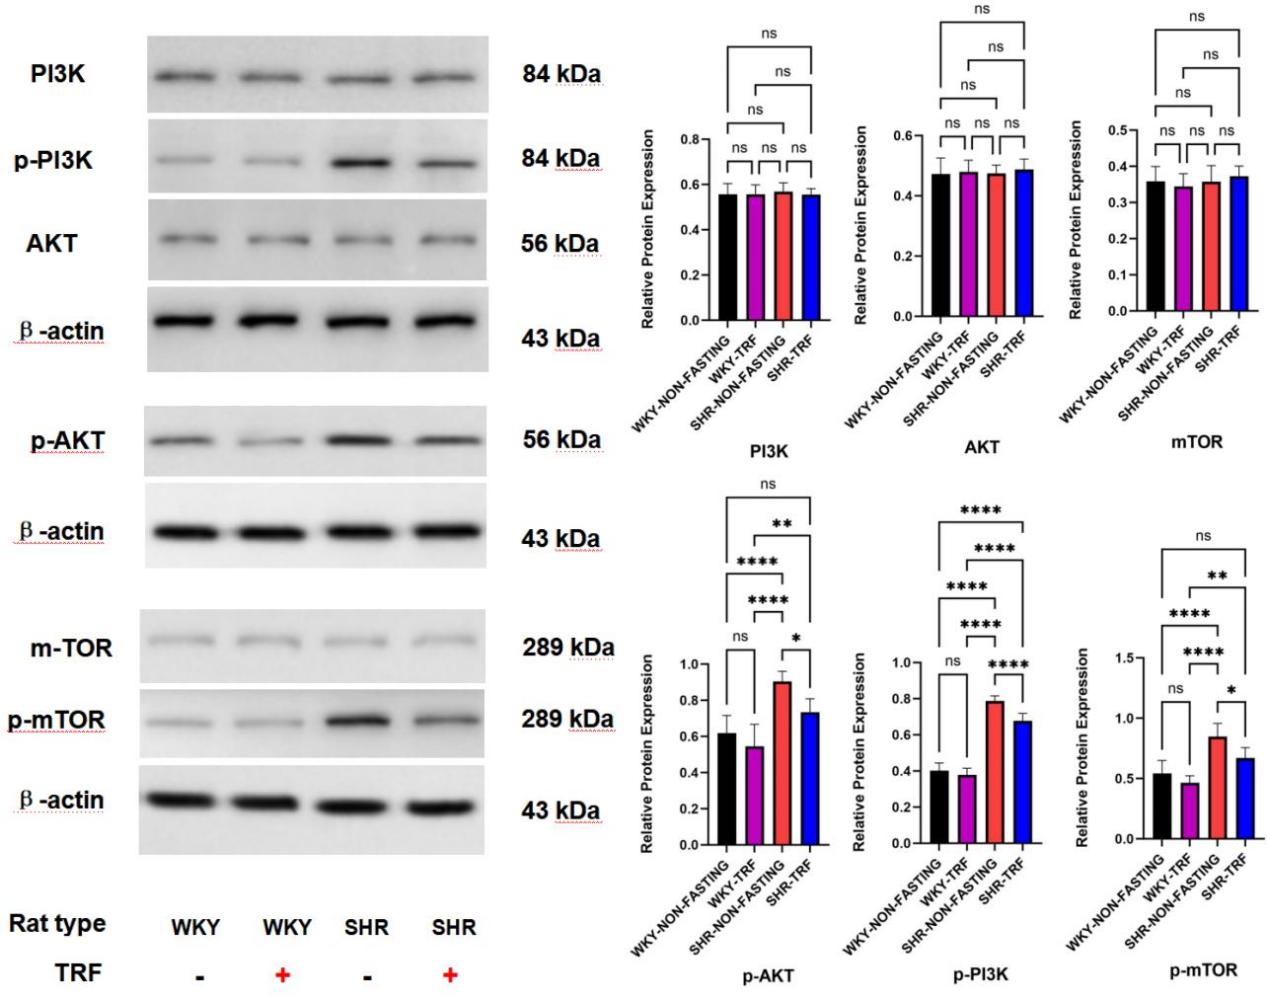
**β-actin(2).tif**

**
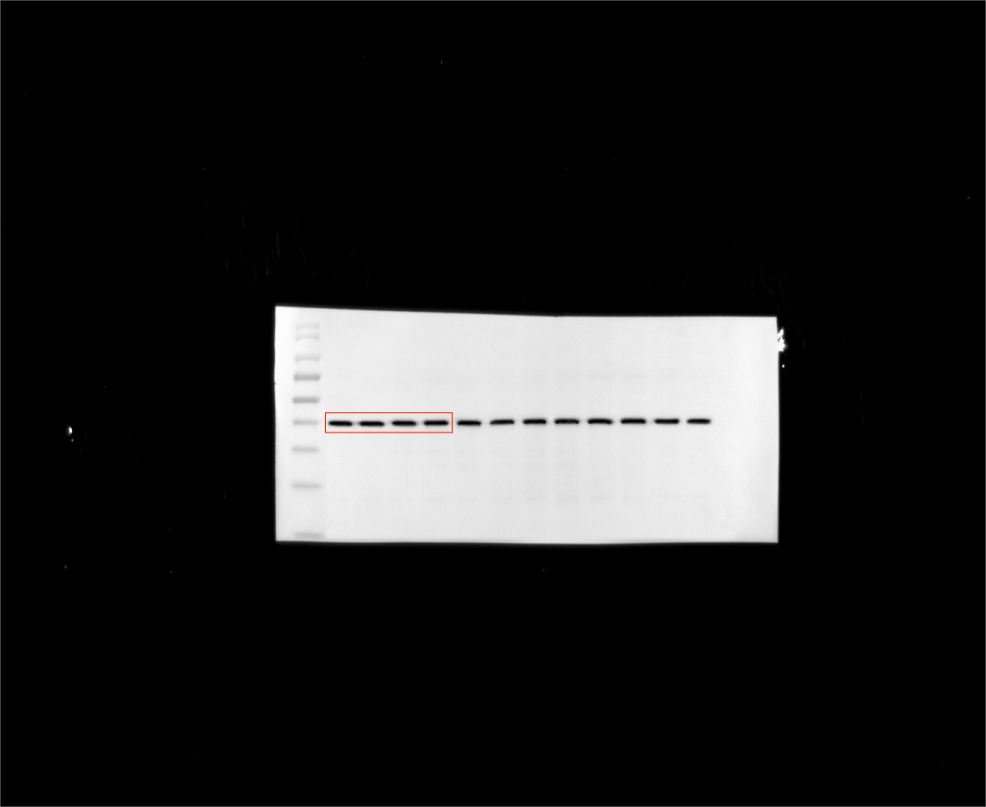
**

**Figure 8**

**1.2 mTOR & p-mTOR**

**mTOR(1).tif**

**
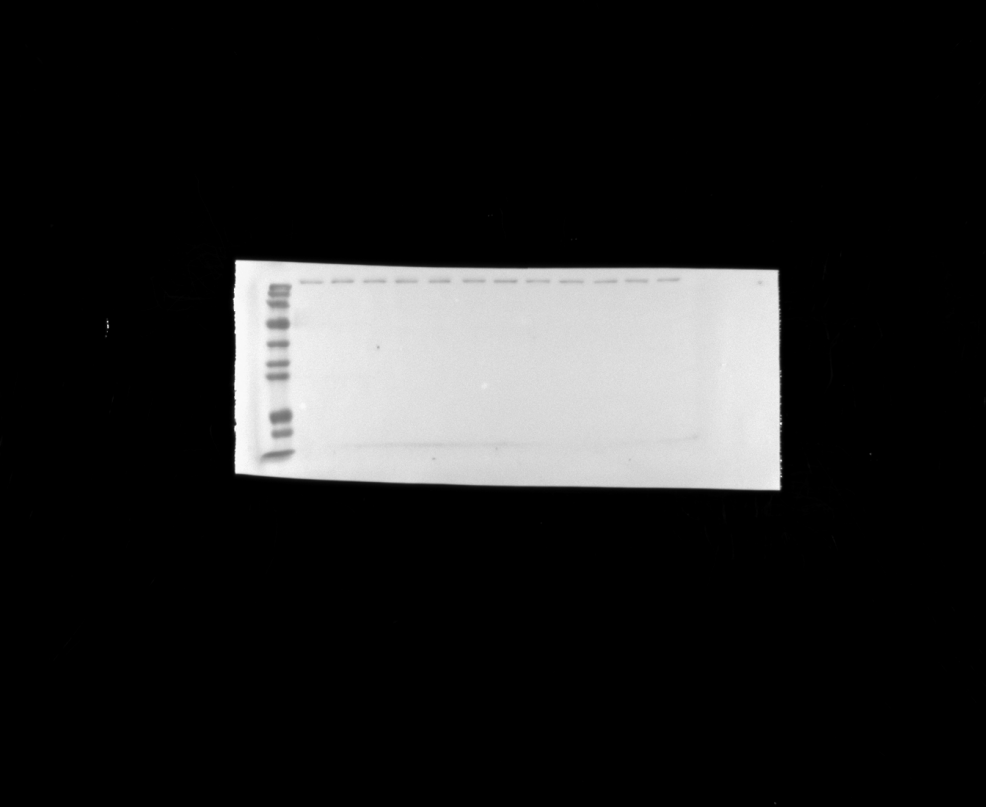
**


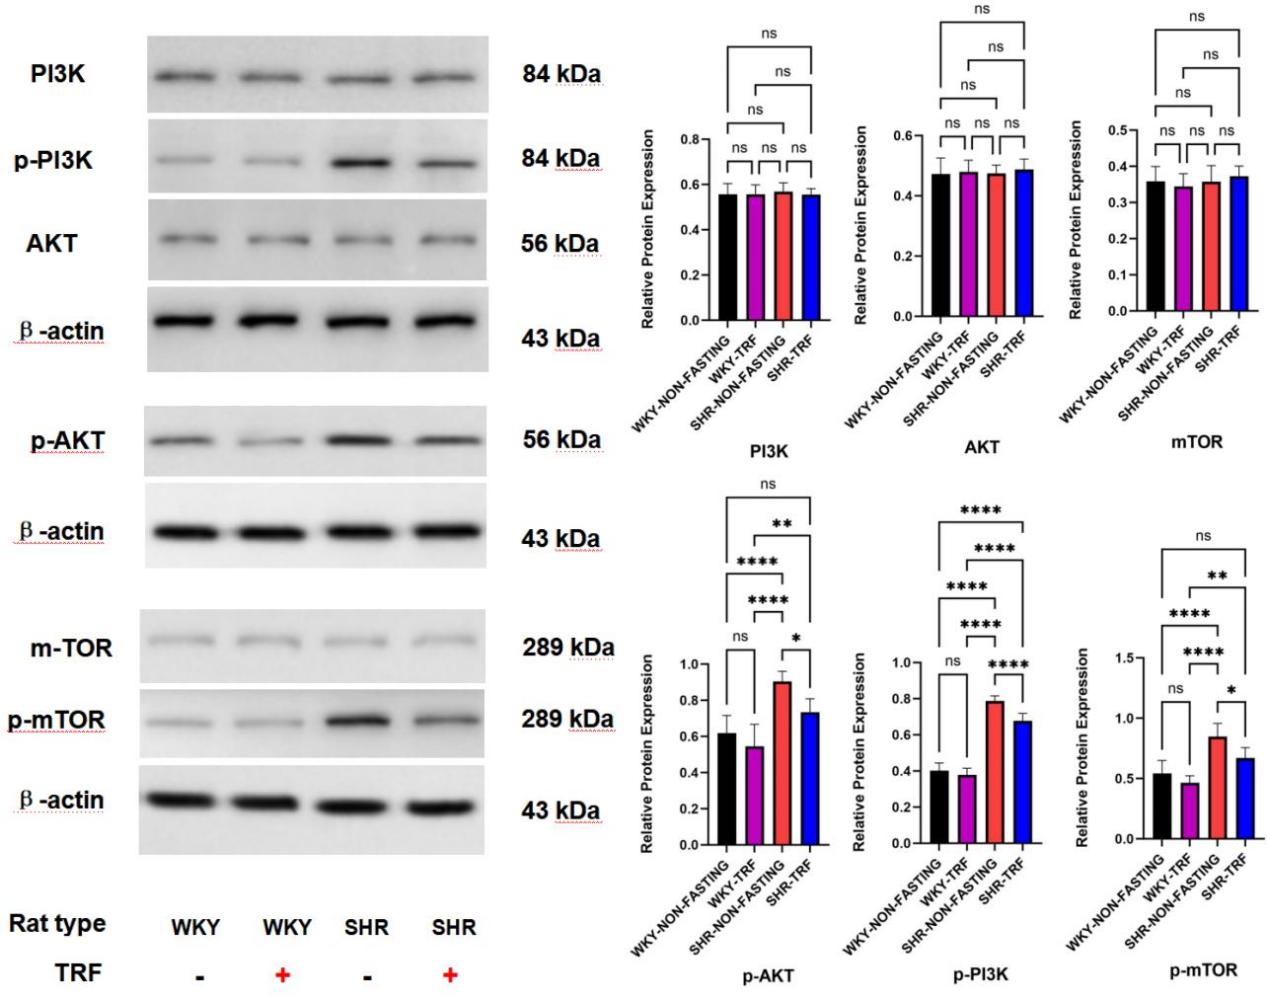
**mTOR(2).tif**

**
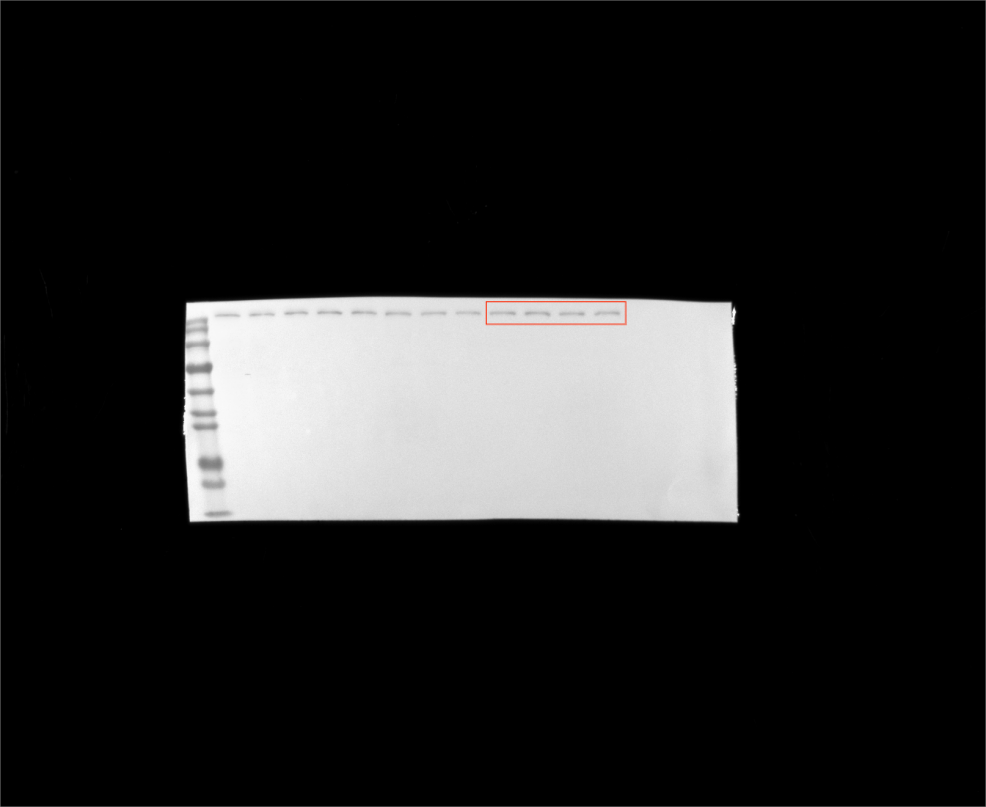
**

**Figure 8**

**p-mTOR(1).tif**

**
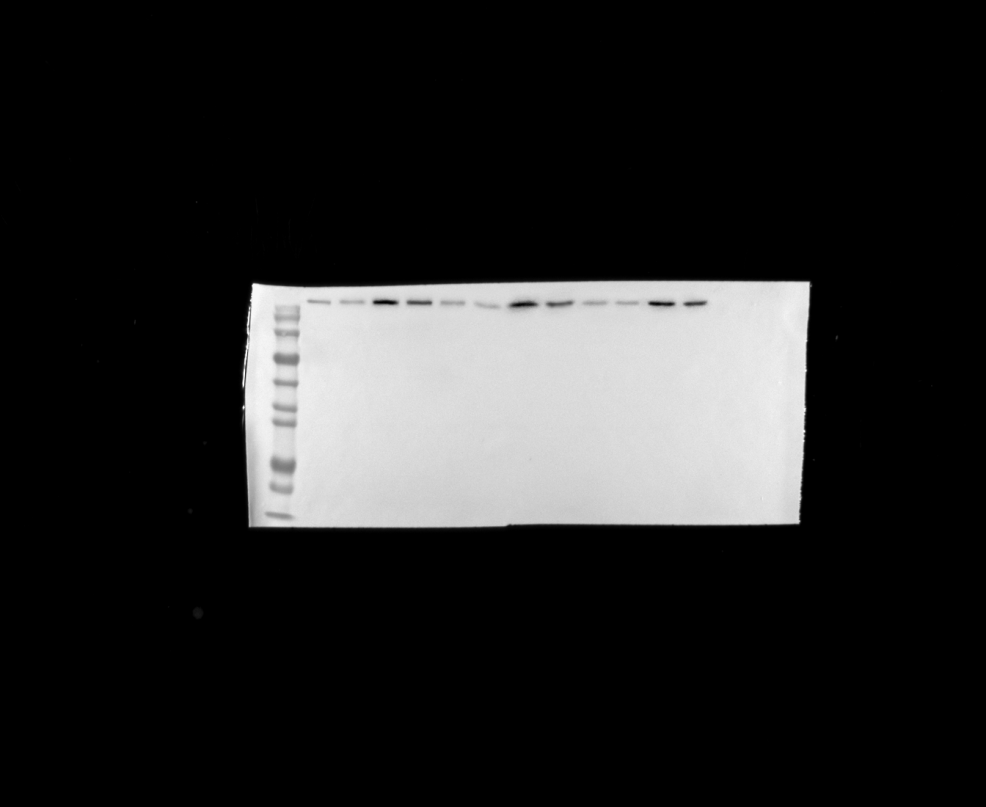
**

**p-mTOR(2).tif**

**
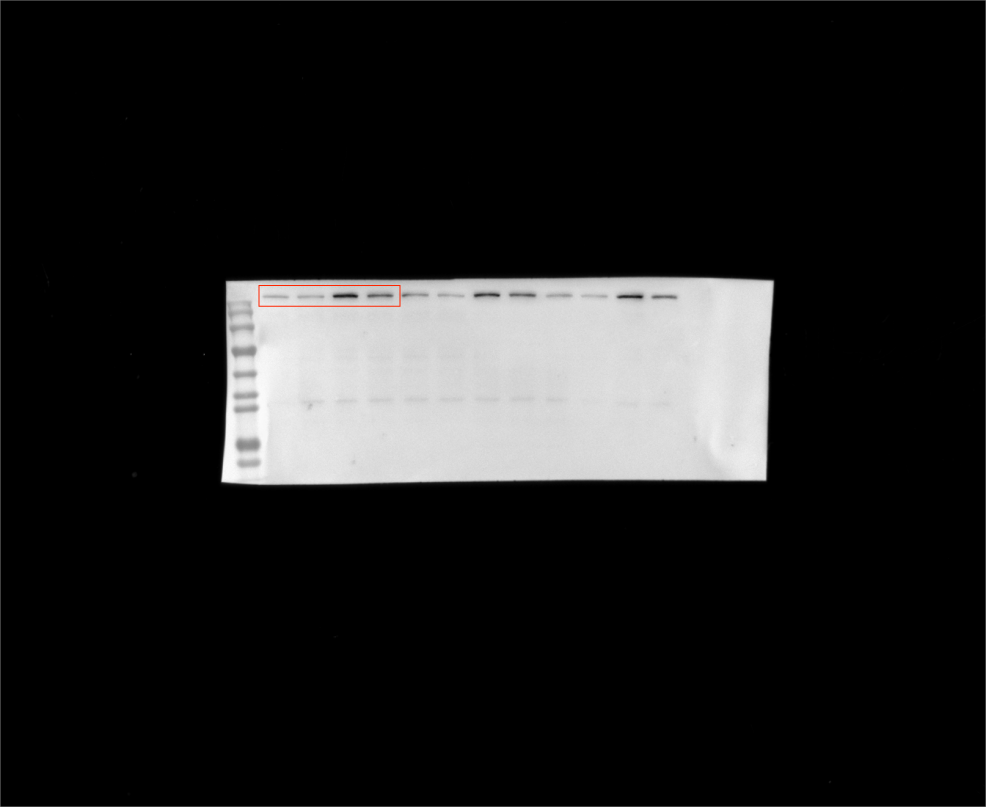
**
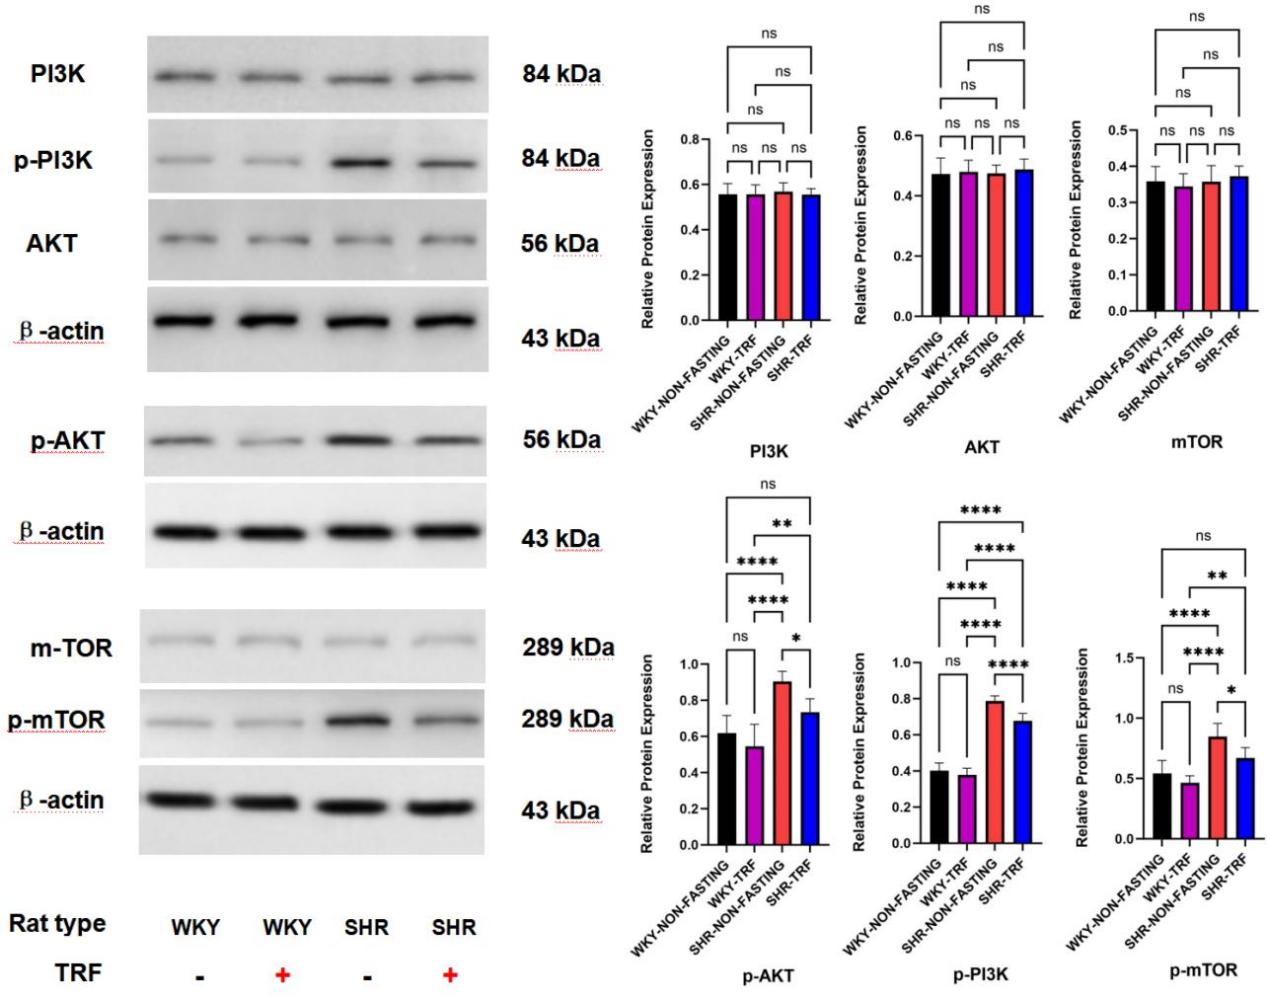


**Figure 8**

**β-actin(1).tif**

**
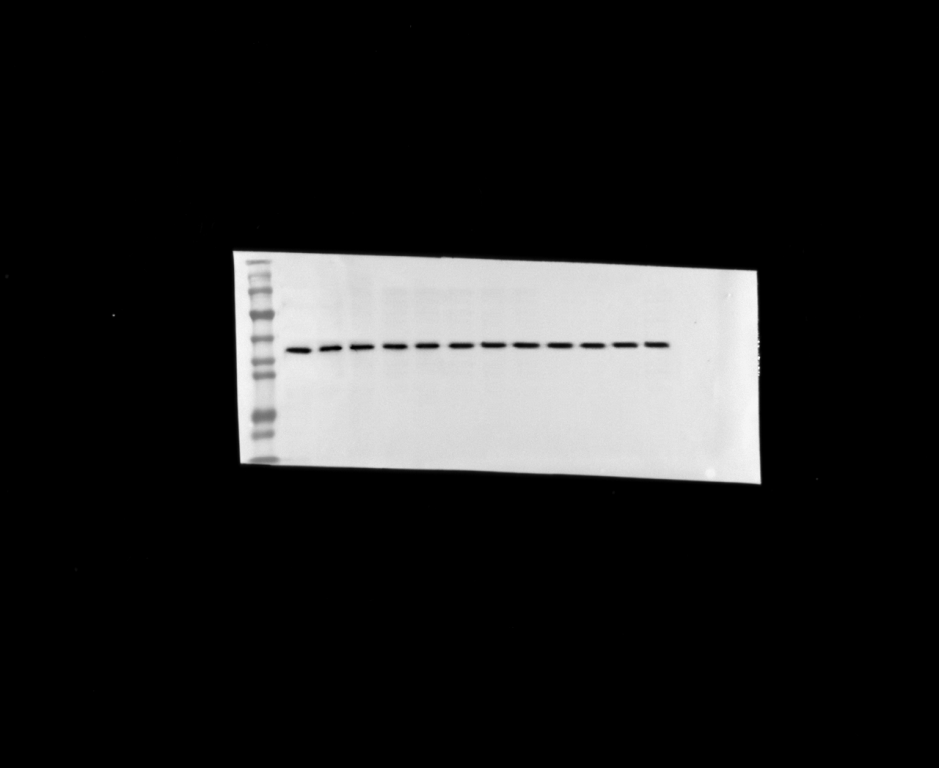
**


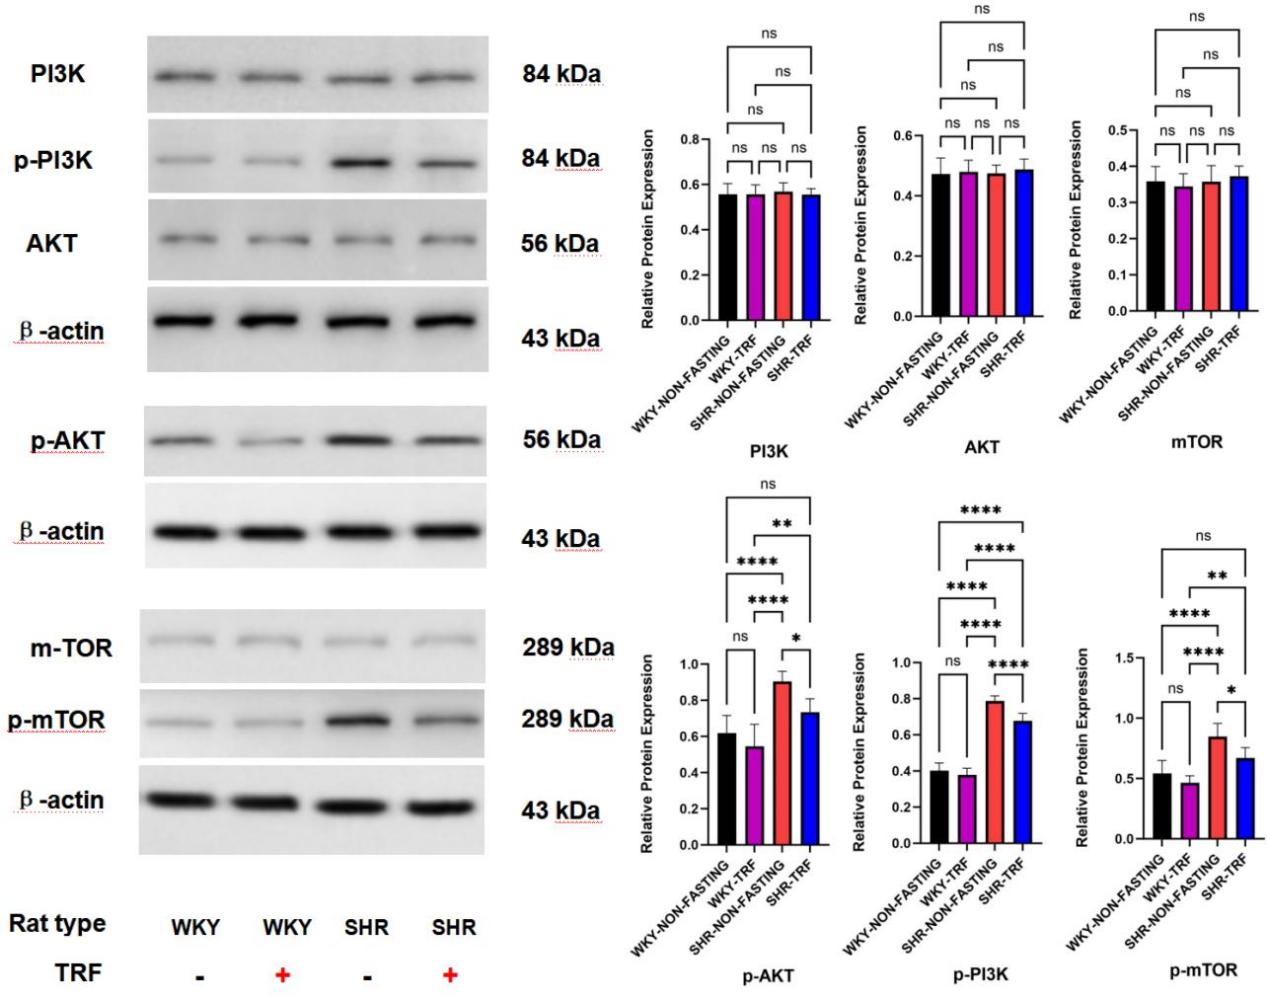
**β-actin(2).tif**

**
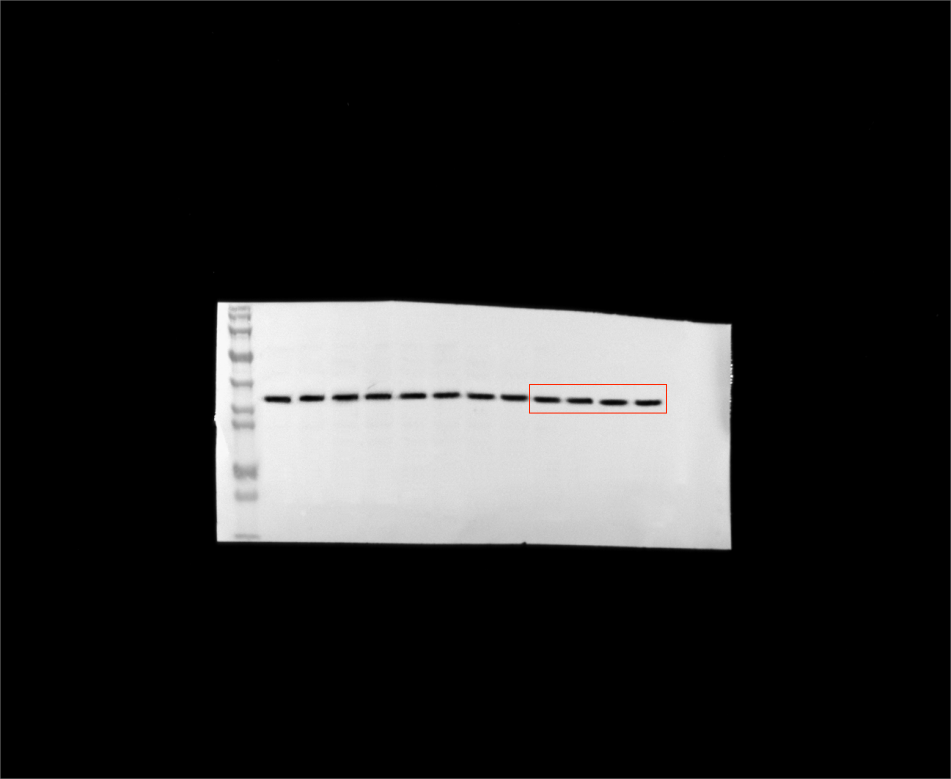
**

**Figure 8**

**1.3 other proteins(PI3K/p-PI3K, AKT, Beclin-1, LC3-I&LC3-2)**

**PI3K(1).tif**

**
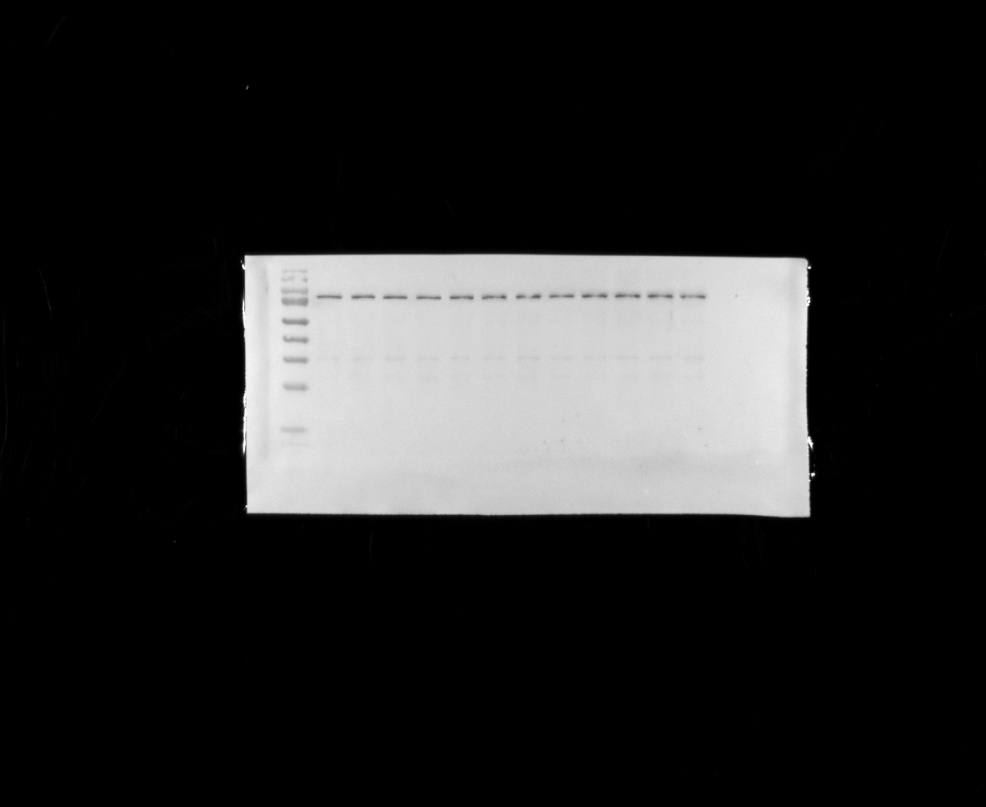
**


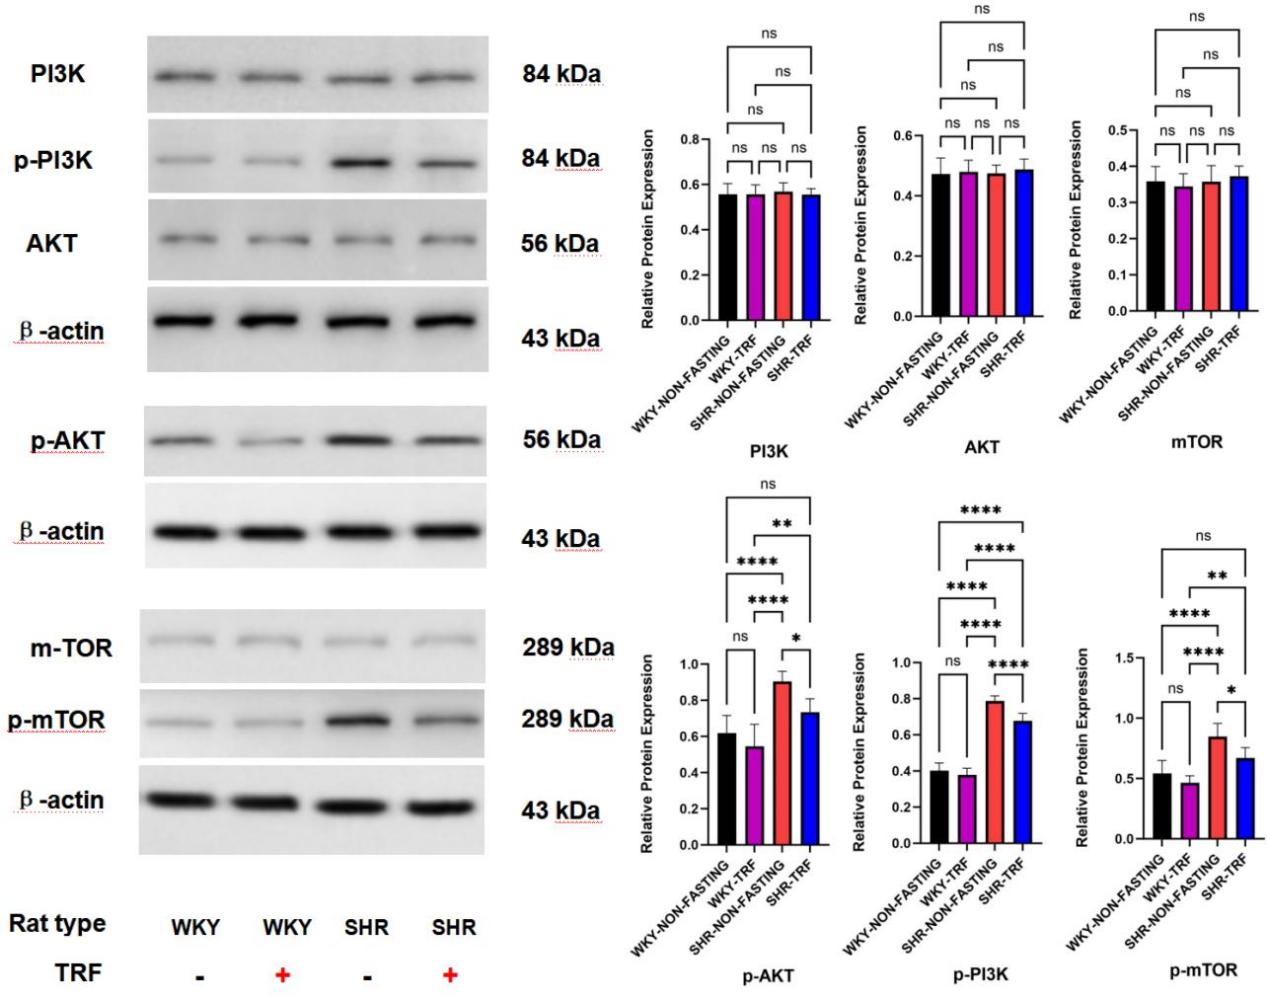
**PI3K(2).tif**

**
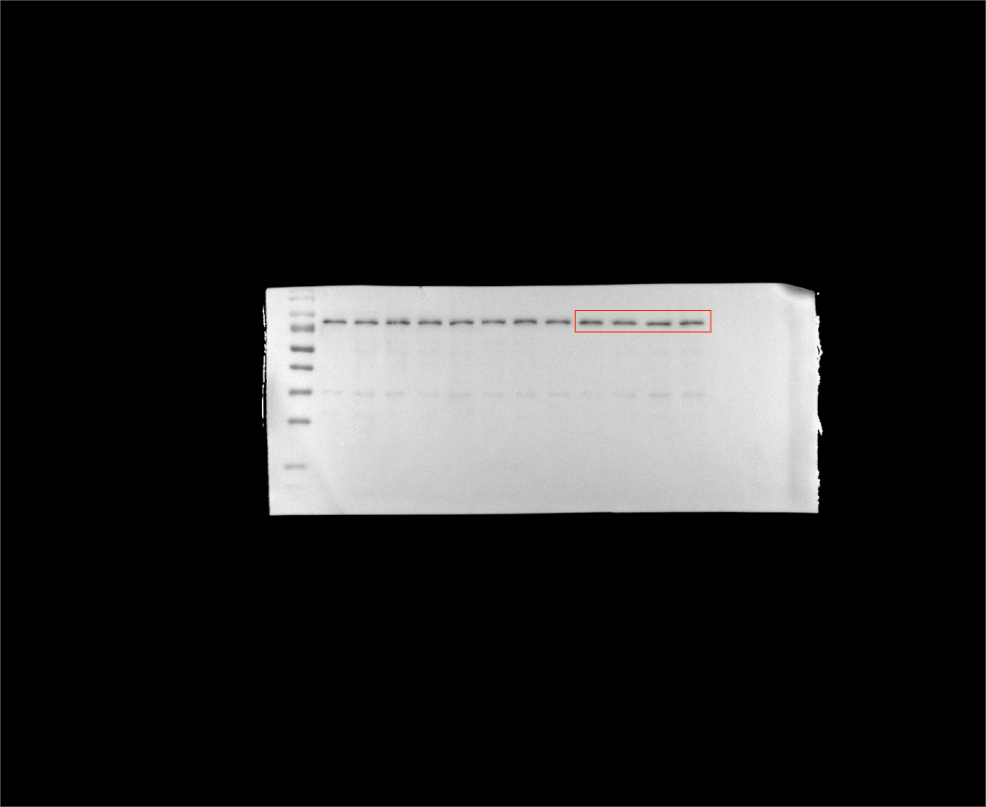
**

**Figure 8**

**p-PI3K(1).tif**

**
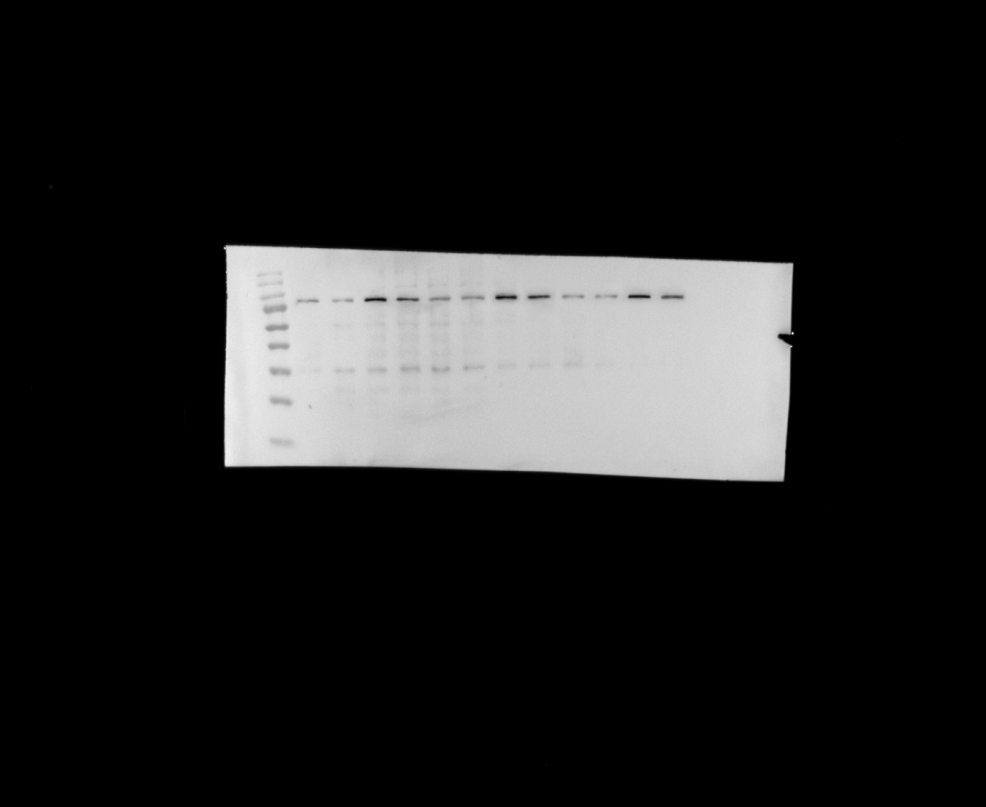
**


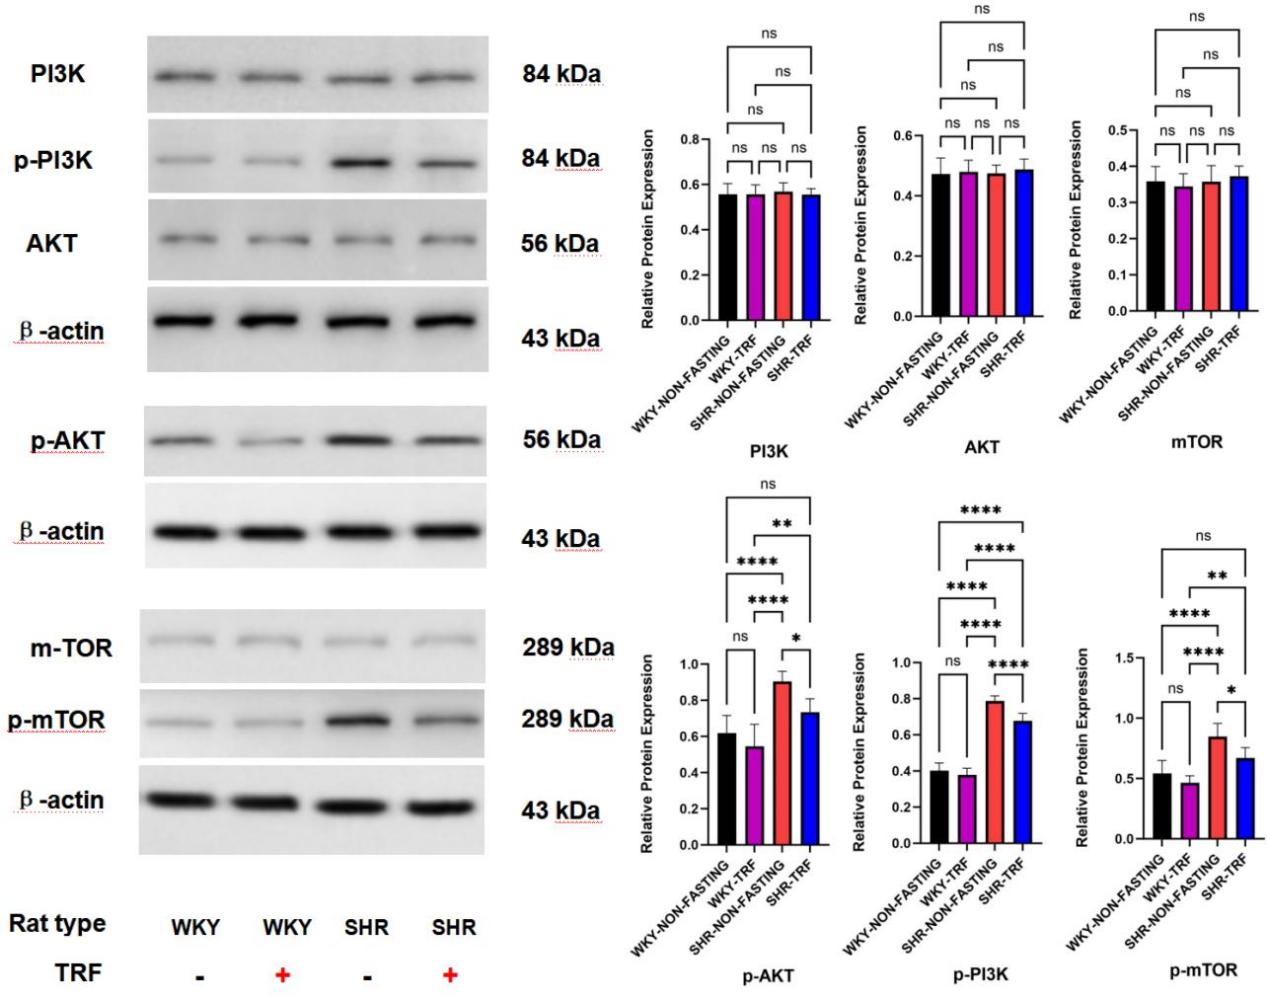
**p-PI3K(2).tif**

**
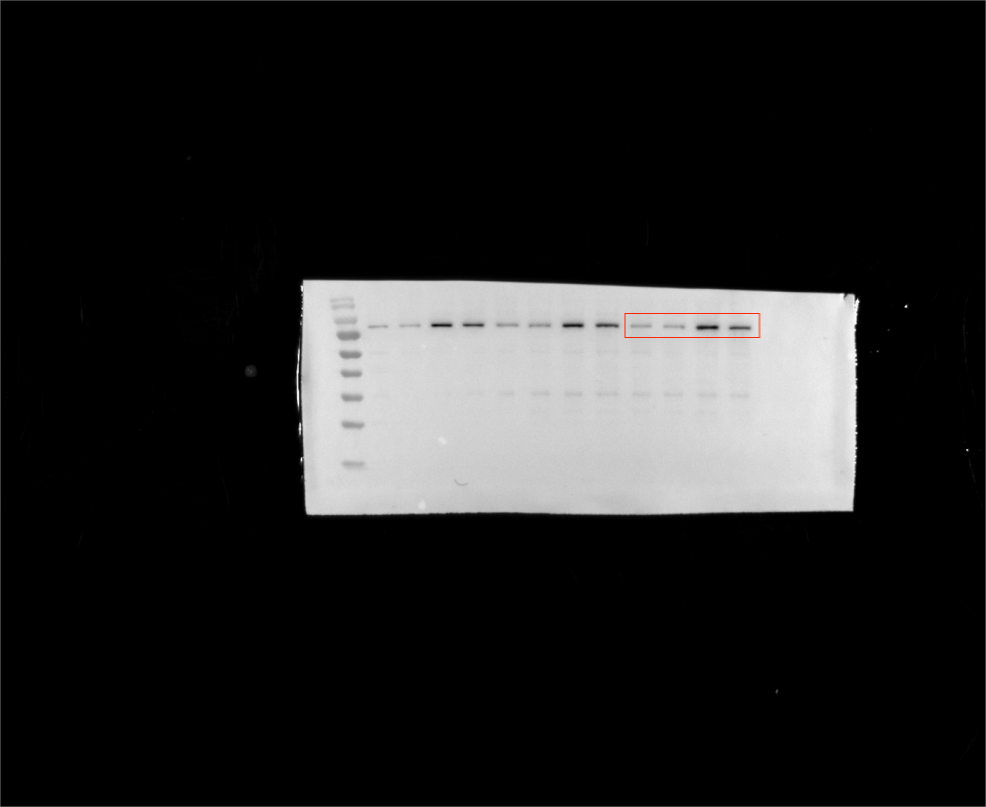
**

**Figure 8**

**AKT(1).tif**

**
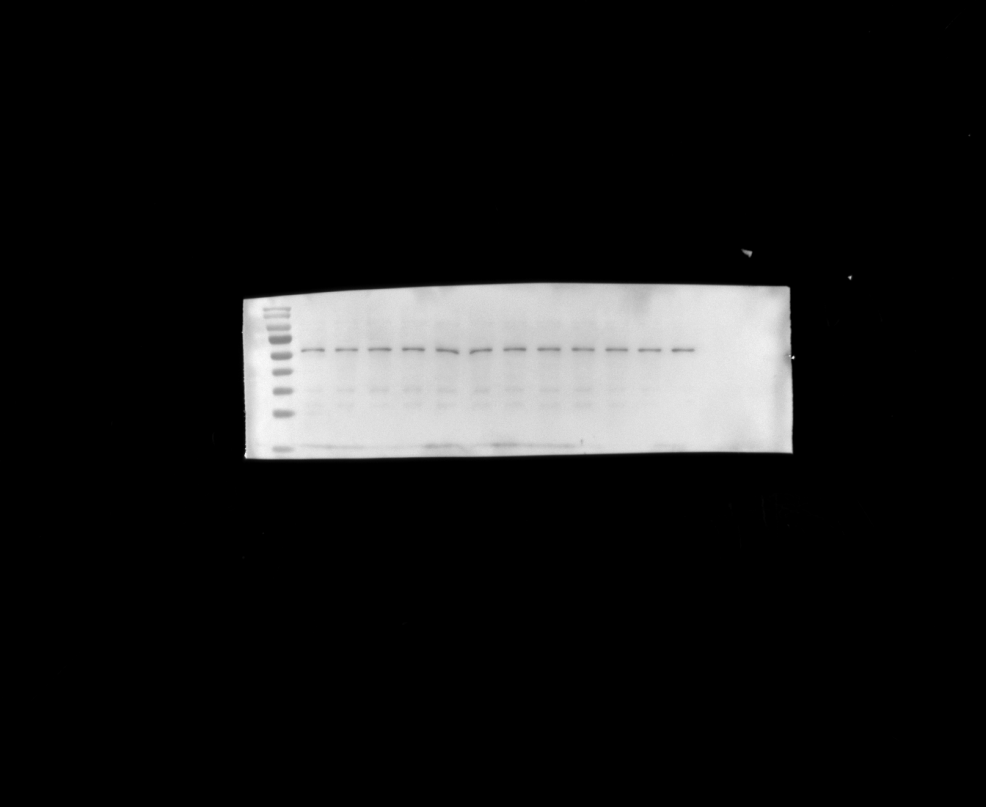
**


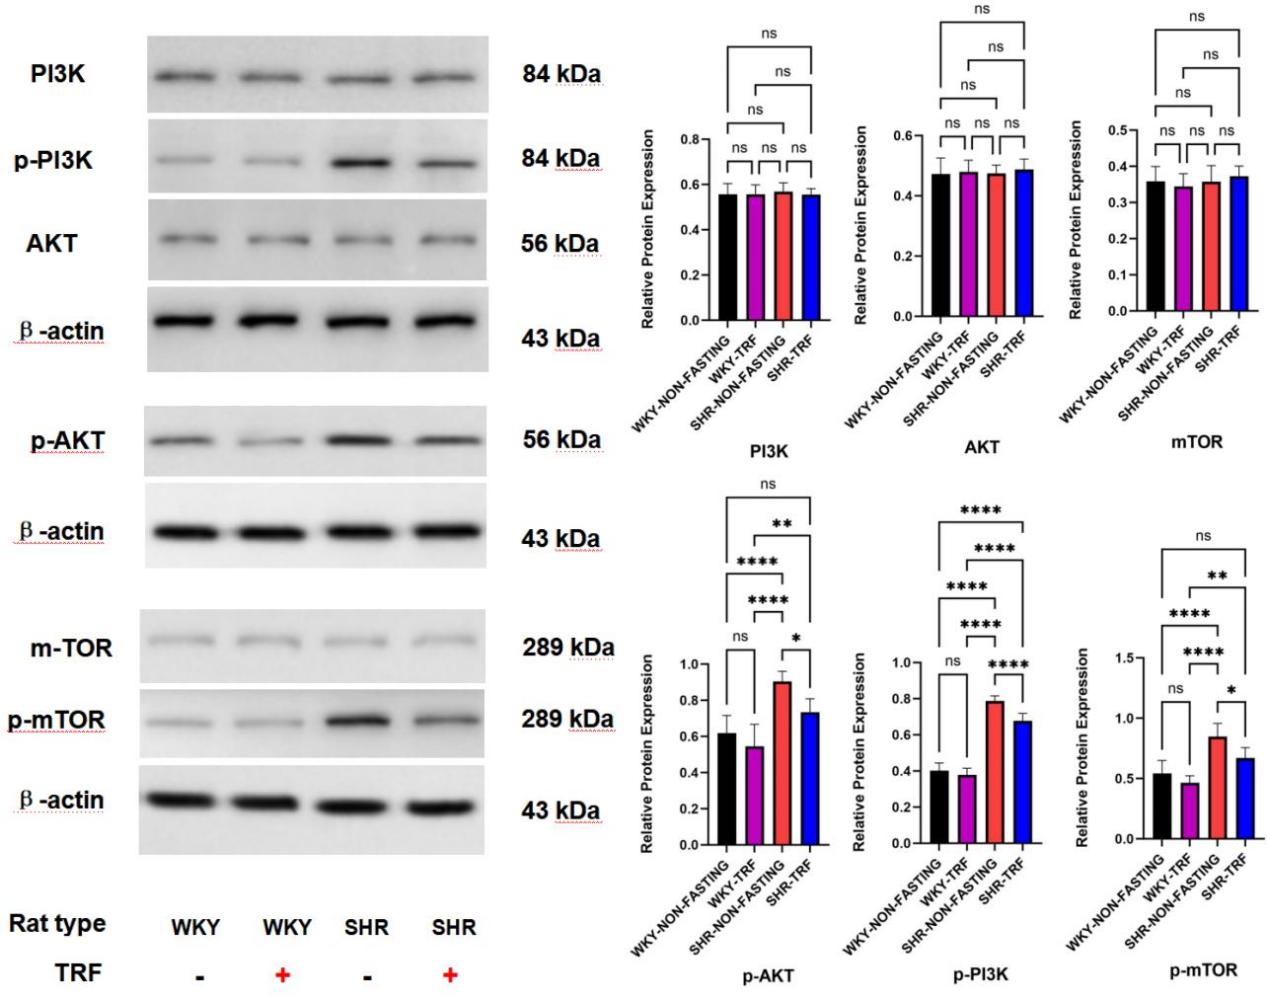
**AKT(2).tif**

**
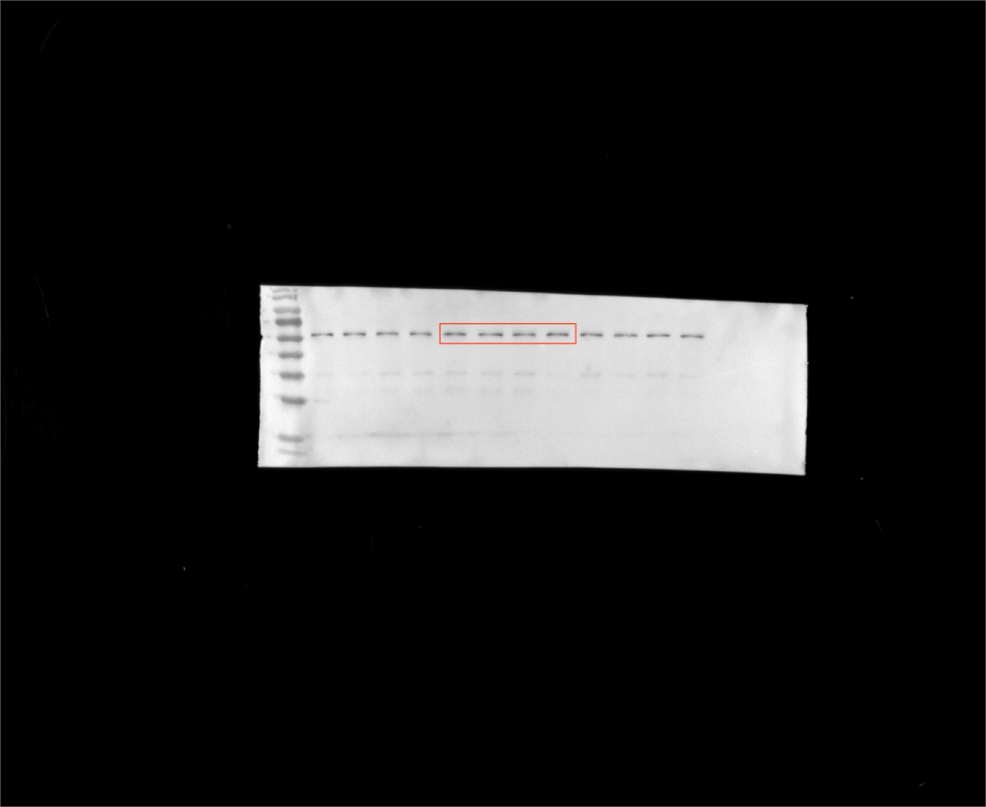
**

**Figure 8**

**Beclin(1).tif**

**
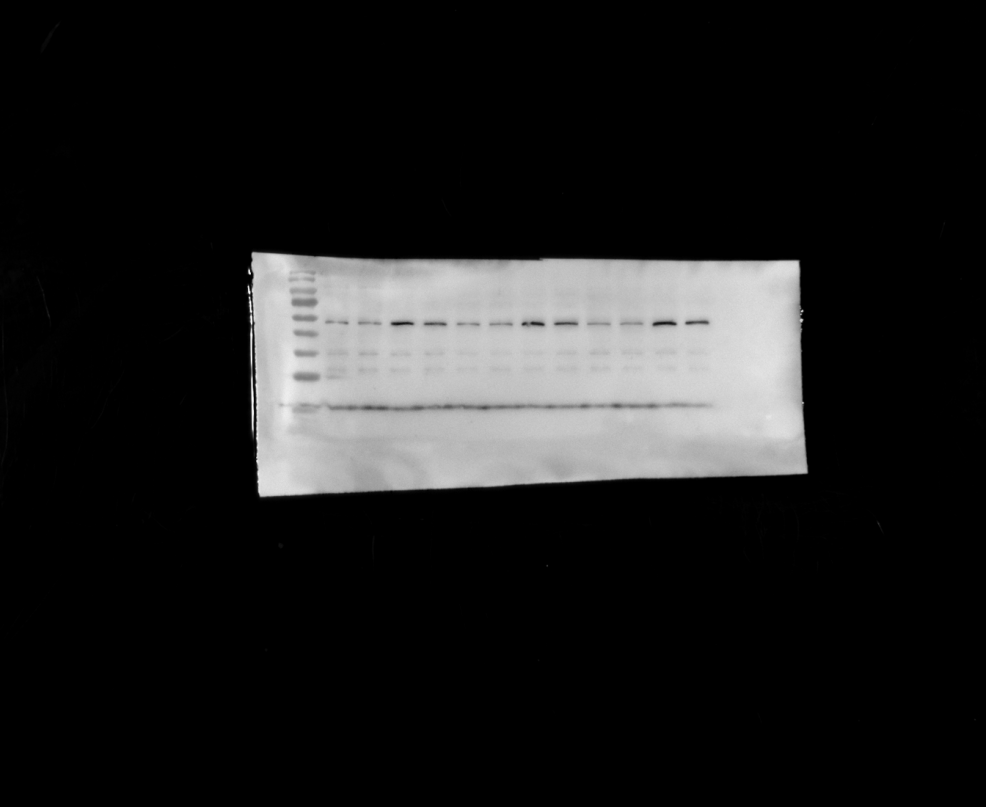
**


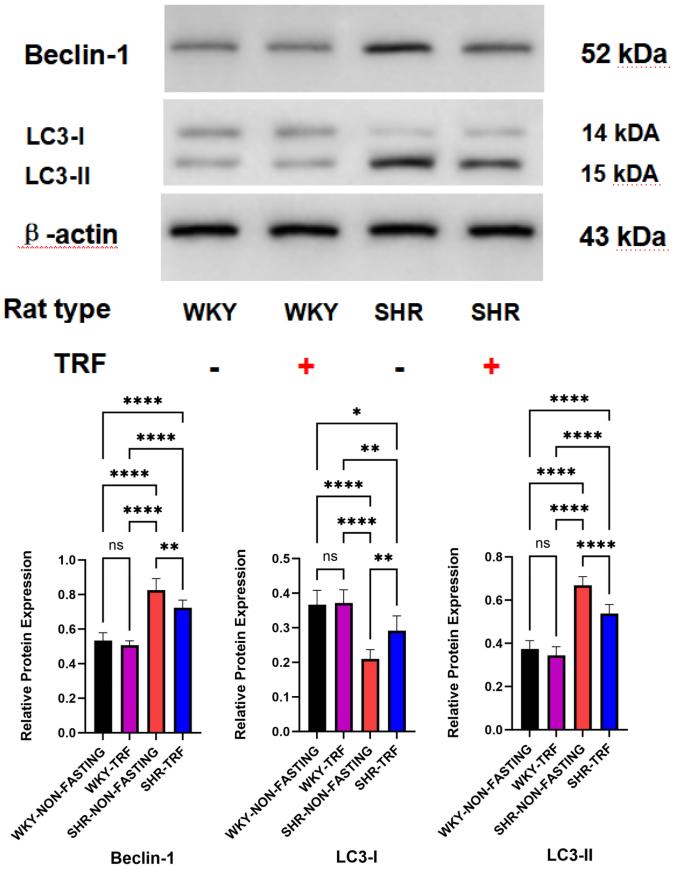
**Beclin(2).tif**

**
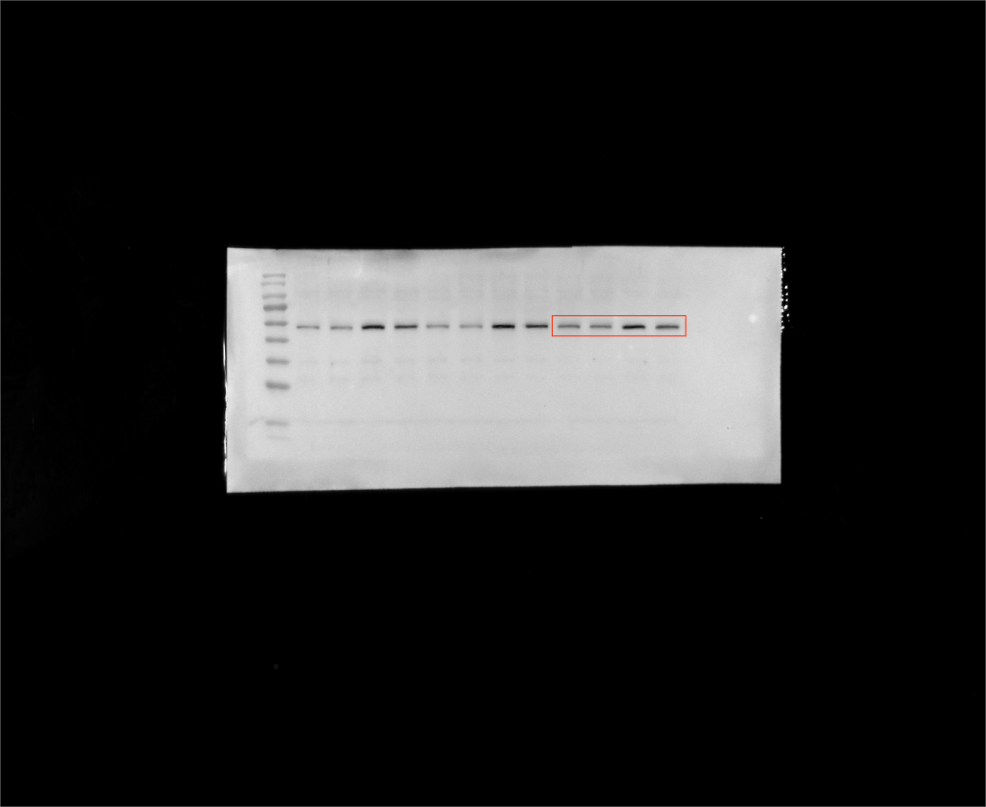
**

**Figure 7**

**LC3-1&2(1).tif**

**
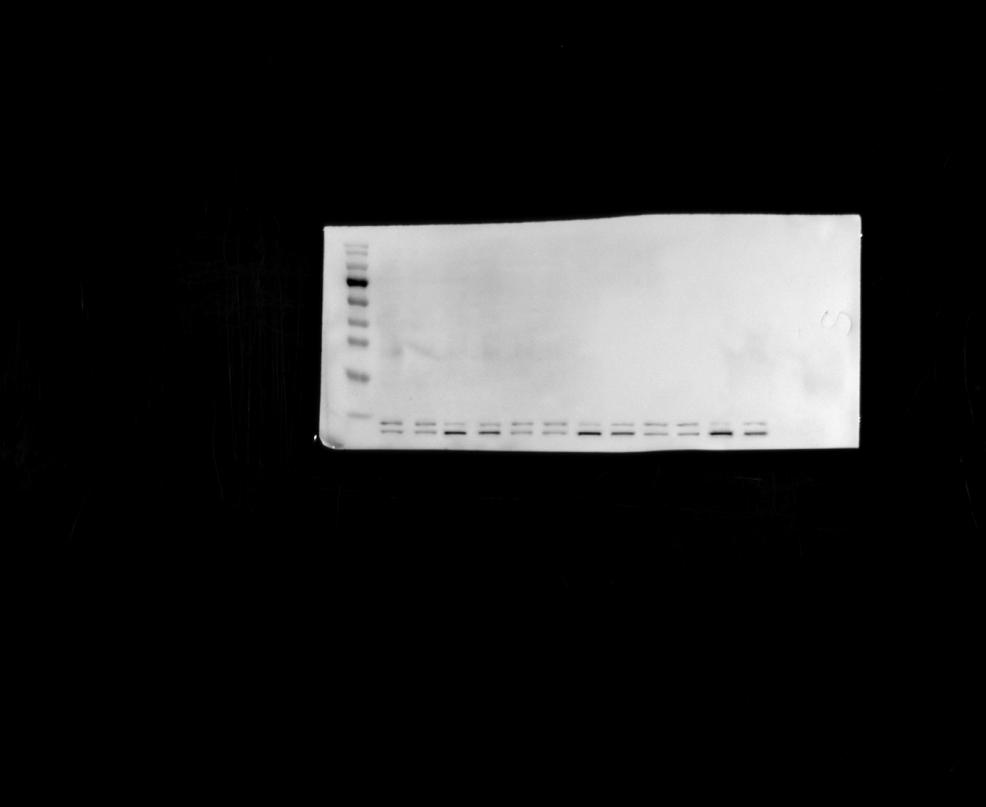
**


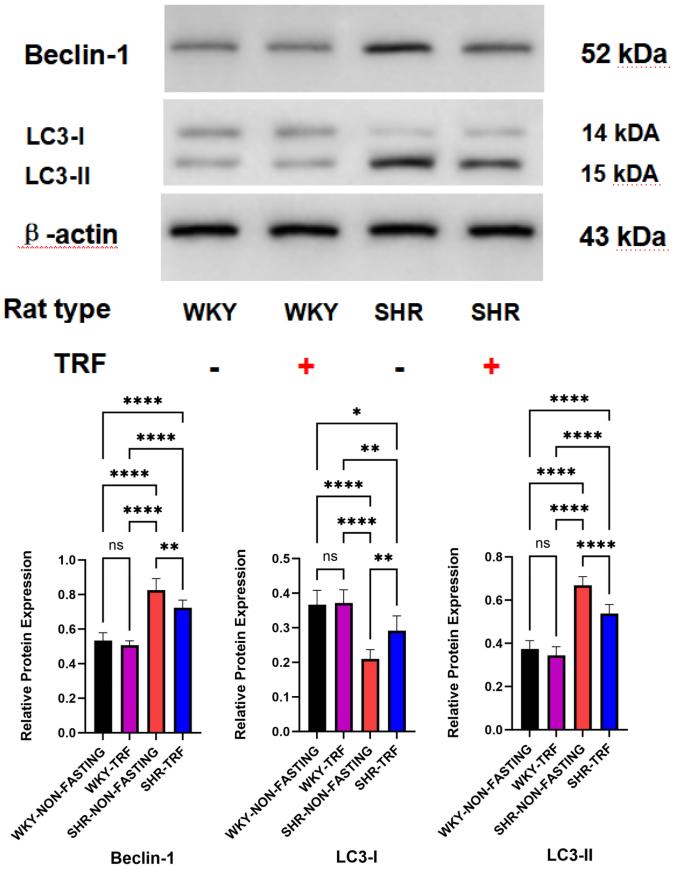
**LC3-1&2(2).tif**

**
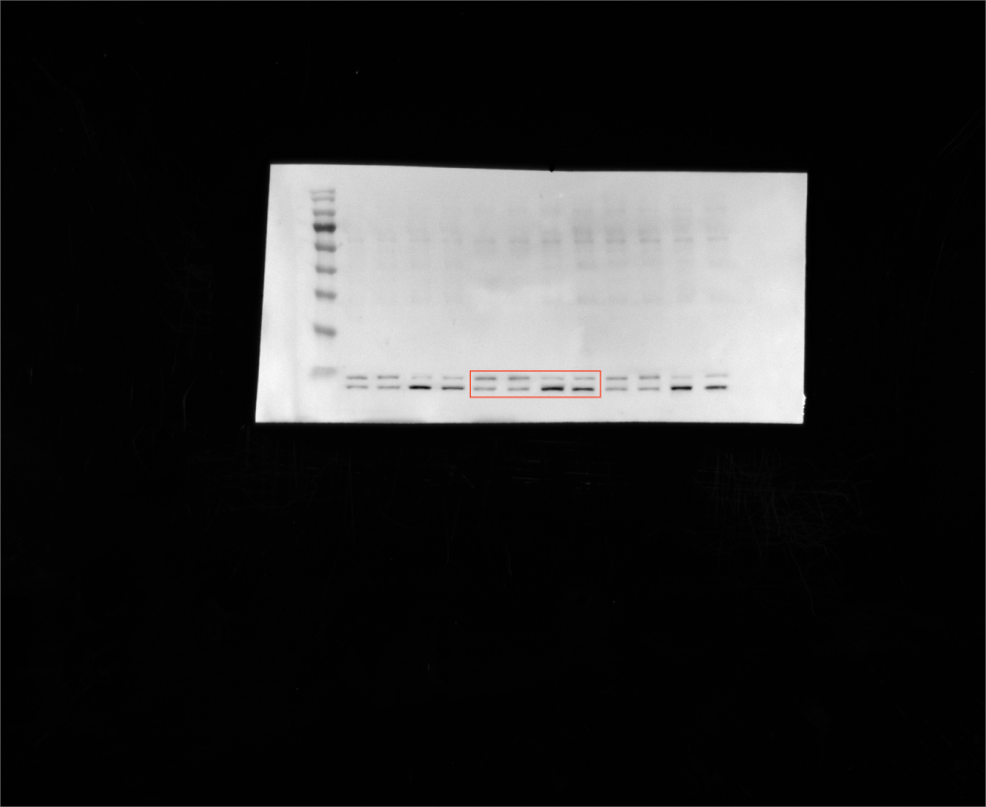
**

**Figure 7**

**β-actin(1).tif**

**
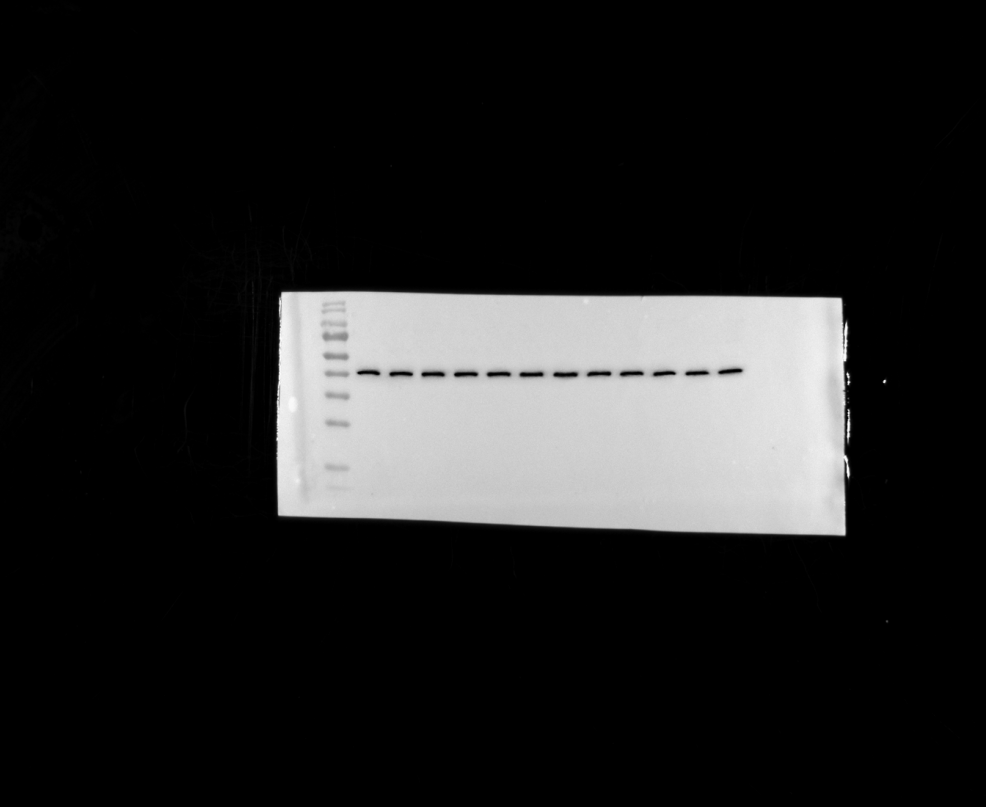
**


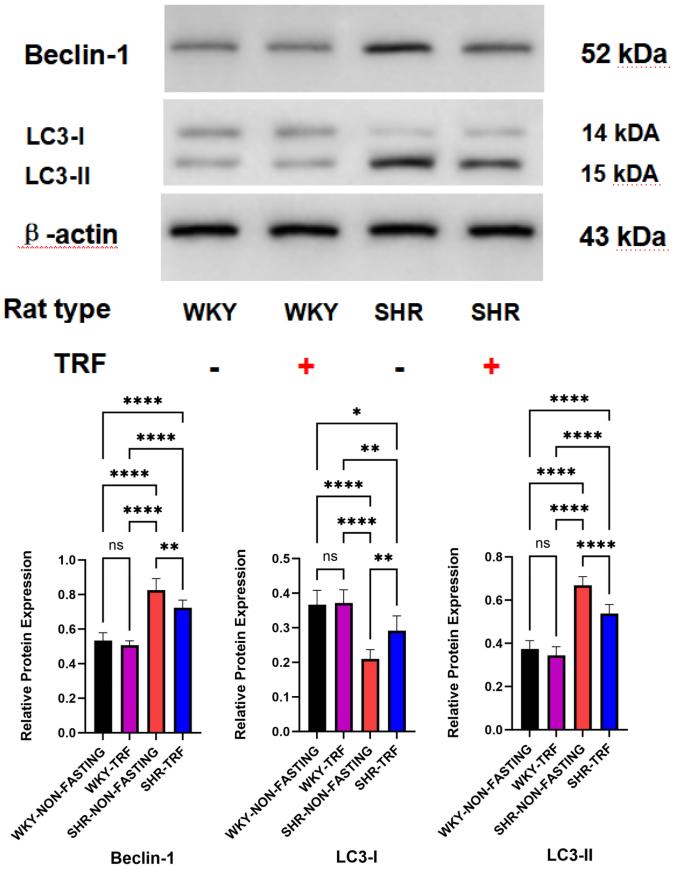
**β-actin(2).tif**


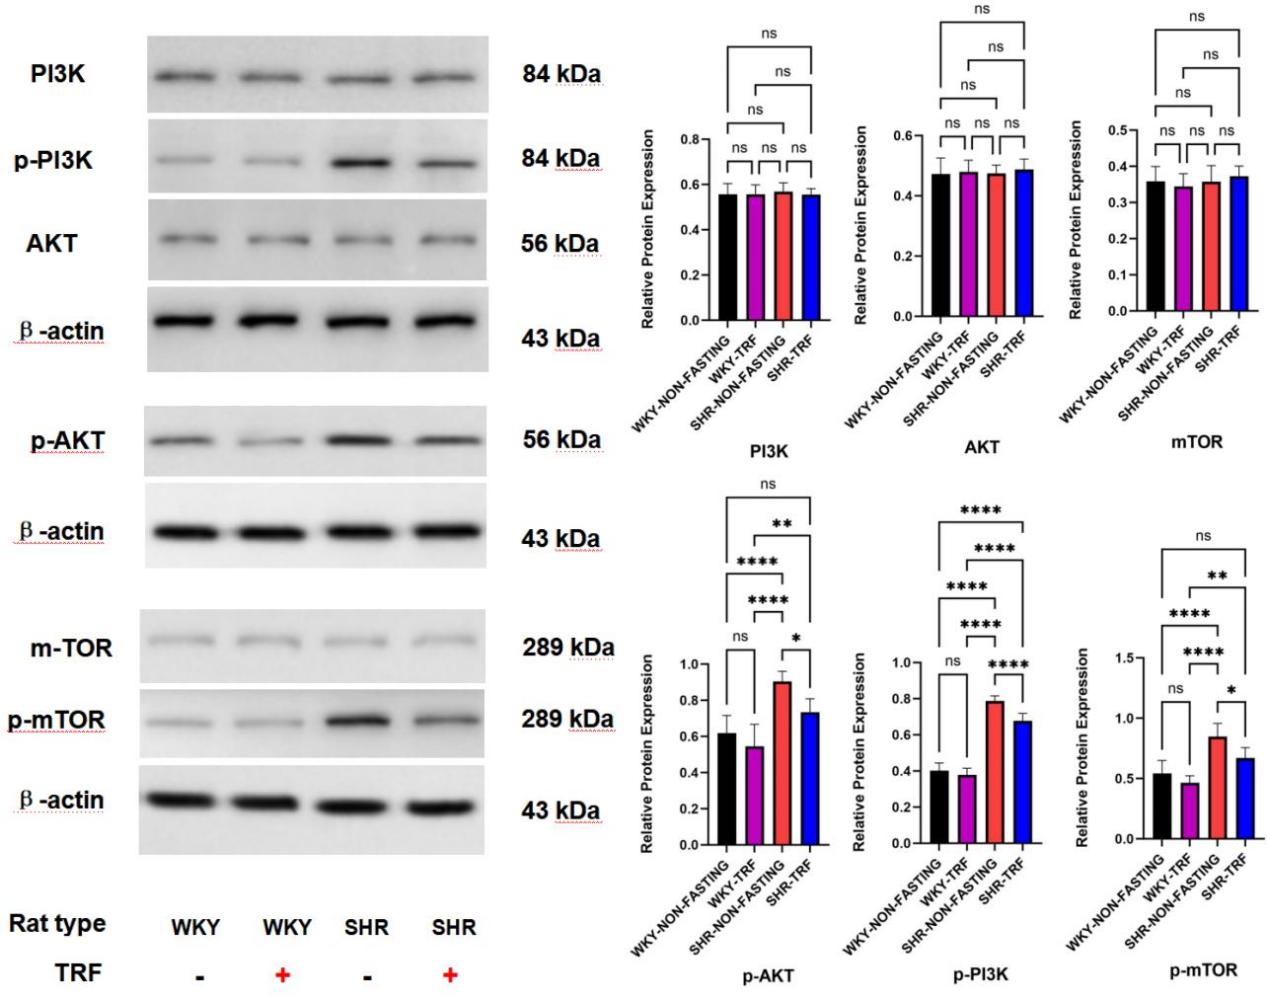
**
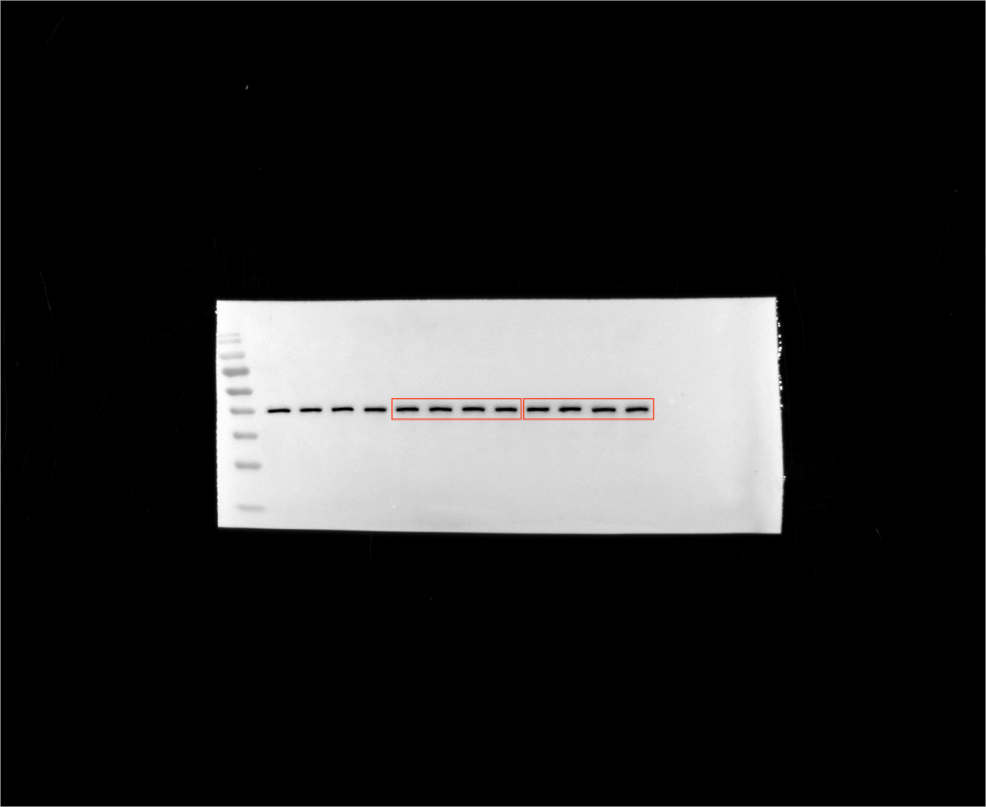
**

**Figure 7**

**Figure 8**
